# Supplementary material for: Persuasive System Design Does Matter: A Systematic Review of Adherence to Web-Based Interventions
Source: PubMed Central journal article supplement (PMC3510730; doi:10.2196/jmir.2104), 2012-11-14
Supplement: jmir_v14i6e152_app1.pdf [file jmir_v14i6e152_app1.pdf]

## Multimedia Appendix 1. Keywords literature search

| <b>Web-based</b>       | <b>Intervention</b> | <b>Adherence</b> | <b>Health</b>  |
|------------------------|---------------------|------------------|----------------|
| web page               | treatment           | Motiv*           | health*        |
| web application        | intervention        | attrition        | behavio*       |
| website                | program             | dropout          | manage*        |
| internet delivered     | programme           | drop out         | self help      |
| web based              | therapy             | adherence        | self control   |
| internet based         | coach               | nonadherence     | selfmanagement |
| internet mediated      |                     | compliance       | self care      |
| internet supported     |                     | noncompliance    |                |
| Online*                |                     | Persist*         |                |
| Medical informatics    |                     | Response*        |                |
| Information technology |                     | nonresponse      |                |
| e health               |                     | loyalty          |                |
| ehealth                |                     | engagement       |                |
| e therap*              |                     | disengagement    |                |
| Telemedic*             |                     | involvement      |                |
| telecare               |                     | noninvolvement   |                |
| telehealth             |                     | reach            |                |
| e mental health        |                     | Intention*       |                |
| Emental health         |                     | Satisfy*         |                |
