# Supplementary material for: Persuasive System Design Does Matter: A Systematic Review of Adherence to Web-Based Interventions
Source: PubMed Central journal article supplement (PMC3510730; doi:10.2196/jmir.2104), 2012-11-14
Supplement: jmir_v14i6e152_app2.pdf [file jmir_v14i6e152_app2.pdf]

## Multimedia appendix 2. Included interventions, targeted behavior or conditions, and studies

| <b>Intervention name</b>        | <b>Behavior/Condition</b>        | <b>Studies</b>                                                            |
|---------------------------------|----------------------------------|---------------------------------------------------------------------------|
| <i>Chronic Condition</i>        |                                  |                                                                           |
| 1. Van den Berg                 | arthritis                        | Van den Berg 2007 [45]; Van den Berg 2006 [79]                            |
| 2. Teens Taking Charge          | arthritis                        | Stinson 2010 [80]                                                         |
| 3. Rheumates@work               | arthritis                        | Lelieveld 2010 [81]                                                       |
| 4. Oneself                      | chronic pain                     | Schulz 2010 [82]                                                          |
| 5. WebMAP                       | chronic pain                     | Long 2009 [83]; Palermo 2009 [84]                                         |
| 6. SPAIN                        | CVD                              | Goessens 2008 [59]; Goessens 2006 [85]                                    |
| 7. DPP                          | diabetes                         | McTigue 2009 [60]                                                         |
| 8. NetPLAY                      | diabetes                         | Liebreich 2009 [71]                                                       |
| 9. My Path1                     | diabetes                         | Glasgow 2011 [70]                                                         |
| 10. My Path2                    | diabetes                         | Glasgow 2011 [70]                                                         |
| 11. YourWay                     | diabetes                         | Mulvaney 2010 [86]                                                        |
| 12. 'Diabetergestemd'           | diabetes                         | Van Bastelaar 2011a [77]; Van Bastelaar 2011b [87]                        |
| 13. WebEase                     | epilepsy                         | DiIorio 2009 [88]                                                         |
| 14. Rekindle                    | erectile dysfunction             | McCabe 2008 [61]; McCabe 2009 [89]                                        |
| 15. Heartnet                    | heart transplant                 | Dew 2004 [90]                                                             |
| 16. Ljottson                    | IBS                              | Ljottson 2010 [58]                                                        |
| 17. MyMigraine                  | migraine                         | Sorbi 2010 [91]                                                           |
| 18. EPP online                  | self-management                  | Lorig 2008 [92]; Lorig 2006 [62]                                          |
| 19. Andersson-T                 | tinnitus                         | Andersson 2002 [93]                                                       |
| <i>Lifestyle</i>                |                                  |                                                                           |
| 20. 5 a Day, the Rio Grande Way | nutrition                        | Woodall 2007 [74]; Buller 2008 [68]                                       |
| 21. Active U                    | PA                               | Buis 2009 [94]                                                            |
| 22. Fun, Food and Fitness Club  | PA, nutrition                    | Thompson 2008 [75]; Thompson 2007 [95]; Baranowski 2003 [96]              |
| 23. Healthy Life Check          | PA, nutrition, smoking cessation | Brouwer 2010 [97]                                                         |
| 24. Happy Ending                | smoking cessation                | Brendryen 2008a [98]; Brendryen 2008b [99]                                |
| 25. Lenert                      | smoking cessation                | Lenert 2003 [100]                                                         |
| 26. QuitCoach                   | smoking cessation                | Balmford 2008 [101]                                                       |
| 27. QuitNet                     | smoking cessation                | Graham 2007 [102]; Saul 2007 [103]; Cobb 2005 [104]                       |
| 28. Real U                      | smoking cessation                | An 2008 [63]; An 2006 [105]                                               |
| 29. Health Partners             | weight management                | Van Wier 2009 [57]                                                        |
| 30. Healthy Weight for Life     | weight management                | Cussler 2008 [69]                                                         |
| 31. LEARN                       | weight management                | Hunter 2008 [106]                                                         |
| 32. Weight Loss Management      | weight management                | Meenan 2009 [107]; Svetkey 2009 [108]; Stevens 2008 [76]; Funk 2010 [109] |
| 33. Step up, Trim down          | weight management                | Bennet 2010 [67]                                                          |
| 34. Healthy Weight Assistant    | weight management                | Kelders 2011 [11]                                                         |
| 35. SHED-IT                     | weight management                | Morgan 2011 [110]                                                         |
| <i>Mental Health</i>            |                                  |                                                                           |
| 36. BRAVE1                      | anxiety                          | March 2009 [66]                                                           |
| 37. BRAVE2                      | anxiety                          | Spence 2011a [64]                                                         |
| 38. Worry Program               | anxiety                          | Titov 2009a [111]                                                         |
| 39. Anxiety program             | anxiety                          | Titov 2010a [112]                                                         |
| 40. Andersson-A                 | anxiety                          | Andersson 2011 [113]                                                      |
| 41. Hedman                      | severe health anxiety            | Hedman 2011a [50]                                                         |
| 42. Down Your Drink             | alcohol                          | Linke 2007 [114]; Linke 2004 [115]                                        |
| 43. 'Alcohol de Baas'1          | alcohol                          | Postel 2010a [116]                                                        |
| 44. 'Alcohol de Baas'2          | alcohol                          | Postel 2010b [117]                                                        |
| 45. M-PASS                      | alcohol                          | Bingham 2010 [118]                                                        |

|                              |                        |                                                              |
|------------------------------|------------------------|--------------------------------------------------------------|
| 46. MORE                     | alcohol and drugs      | Klein 2012 [119]                                             |
| 47. RealTeen                 | drug abuse prevention  | Schwinn 2010 [120]                                           |
| 48. BEP1                     | bipolar disorder       | Nicholas 2010 [121]                                          |
| 49. BEP2                     | bipolar disorder       | Nicholas 2010 [121]                                          |
| 50. Everything under Control | depression             | Van Straten 2008 [122]; Warmerdam 2008 [123]                 |
| 51. Colour your Life1        | depression             | De Graaf 2009a [124]; De Graaf 2009b [125]                   |
| 52. Colour your Life2        | depression             | Warmerdam 2008 [123]                                         |
| 53. Deprexis                 | depression             | Meyer 2009 [126]                                             |
| 54. Master your Mood         | depression             | Gerrits 2007 [51]                                            |
| 55. MoodGym                  | depression             | Christensen 2006 [127]                                       |
| 56. Sadness                  | depression             | Perini 2009 [52]                                             |
| 57. MoodManager              | depression             | Mohr 2010 [46]                                               |
| 58. Vernmark                 | depression             | Vernmark 2010 [47]                                           |
| 59. Wellbeing program        | depression and anxiety | Titov 2011 [128]                                             |
| 60. Carrard1                 | eating disorder        | Carrard 2011a [129]                                          |
| 61. Carrard2                 | eating disorder        | Carrard 2011b [48]                                           |
| 62. Carlbring1               | panic disorder         | Carlbring 2005 [130]                                         |
| 63. Carlbring2               | panic disorder         | Carlbring 2006 [131]                                         |
| 64. Panic Center             | panic disorder         | Farvolden 2005 [132]                                         |
| 65. Panic Online1            | panic disorder         | Klein 2006 [133]; Richards 2006 [134]                        |
| 66. Panic Online2            | panic disorder         | Richards 2006 [134]; Kiropoulos 2008 [135]; Klein 2009 [136] |
| 67. Panic Online3            | panic disorder         | Klein 2009 [136]                                             |
| 68. Interapy                 | panic disorder         | Ruwaard 2010 [137]                                           |
| 69. Panic program            | panic disorder         | Wims 2010 [138]                                              |
| 70. PTSD program             | PTSD                   | Spence 2011b [49]                                            |
| 71. PTSD online              | PTSD                   | Klein 2010 [139]                                             |
| 72. Andersson-S1             | social phobia          | Andersson 2006 [140]; Tilfors 2008 [141]                     |
| 73. Andersson-S2             | social phobia          | Tilfors 2008 [141]; Furmark 2009 [142]; Tilfors 2011 [143]   |
| 74. Andersson-S3             | social phobia          | Carlbring 2007 [144]                                         |
| 75. Andersson-S4             | social phobia          | Hedman 2011b [145]                                           |
| 76. IAR                      | social phobia          | Furmark 2009 [142]                                           |
| 77. Shyness1                 | social phobia          | Titov 2008a [55]; Titov 2008b [56]; Titov 2008c [54]         |
| 78. Shyness2                 | social phobia          | Aydos 2009 [53]                                              |
| 79. Shyness3                 | social phobia          | Titov 2008c [54]                                             |
| 80. Shyness4                 | social phobia          | Titov 2009b [72]                                             |
| 81. Shyness5                 | social phobia          | Titov 2009b [72]; Titov 2009c [73]                           |
| 82. Shyness6                 | social phobia          | Titov 2009c [73]                                             |
| 83. Shyness 7                | social phobia          | Titov 2010b [65]                                             |
