# Supplementary material for: Persuasive System Design Does Matter: A Systematic Review of Adherence to Web-Based Interventions
Source: PubMed Central journal article supplement (PMC3510730; doi:10.2196/jmir.2104), 2012-11-14
Supplement: jmir_v14i6e152_app3.pdf [file jmir_v14i6e152_app3.pdf]

Multimedia appendix 3. Characteristics of, and adherence to, web-based interventions included in this study

| Intervention name<br><i>study level</i> | Intended usage                                                                       | Actual usage                                                               | Setup   | Updates | Duration (weeks) | Interaction <sup>a</sup> |               |       | Modality <sup>b</sup> |   |   | Persuasive technology <sup>c</sup> |         |    | Adherence (in %) |
|-----------------------------------------|--------------------------------------------------------------------------------------|----------------------------------------------------------------------------|---------|---------|------------------|--------------------------|---------------|-------|-----------------------|---|---|------------------------------------|---------|----|------------------|
|                                         |                                                                                      |                                                                            |         |         |                  | System                   | Care provider | Peers | 1                     | 2 | 3 | PTS                                | DS      | SS |                  |
| Chronic Condition                       |                                                                                      |                                                                            |         |         |                  |                          |               |       |                       |   |   |                                    |         |    |                  |
| 1. Van den Berg <i>RCT</i>              | return PA schedule at least 26/52 weeks                                              | n = 44 high or sufficient PA schedule return rate                          | modules | weekly  | 52               | none                     | 1/week        | FNS   | +                     | - | - | b,c                                | k       | r  | 52               |
| 2. Teens Taking Charge <i>RCT</i>       | complete 12 modules and weekly phone calls with a coach within a maximum of 21 weeks | 91% completed 12 modules                                                   | modules | weekly  | 12-21            | none                     | more          | FNS   | -                     | - | + | b,c,e                              | j       | r  | 91               |
| 3. Rheumates @work <i>RCT</i>           | complete 17 lessons in 17 weeks                                                      | n = 14 completed the internet program                                      | modules | weekly  | 17               | FNS                      | 1/week        | less  | +                     | - | + | b,c,d,f                            | j,k,m,n | r  | 82               |
| 4. Oneself <i>Observational</i>         | login 11 times in 12 months                                                          | n = 516 used 0-10 times; n = 169 used 11-100 times; n = 63 used 101+ times | free    | weekly  | 52               | none                     | less          | FNS   | -                     | - | - | a,c                                | -       | r  | 31               |
| 5. WebMAP <i>RCT</i>                    | complete 8 modules                                                                   | 20/26 completed all 8 modules                                              | modules | weekly  | 8                | more                     | 1/week        | none  | -                     | - | - | b,c,d,e,g                          | j,l,m   | p  | 77               |
| 6. SPAIN <i>Observational</i>           | login frequently                                                                     | n = 5 used <6 times; n = 13 used >=6 - <26 times; n=18 used >=26 -         | free    | weekly  | 26               | FNS                      | less          | none  | -                     | - | - | a,c,e                              | j       | -  | 64               |

|                                     |                                  |                                                                                       |         |                  |    |        |        |        |   |   |   |         |       |     |  |    |
|-------------------------------------|----------------------------------|---------------------------------------------------------------------------------------|---------|------------------|----|--------|--------|--------|---|---|---|---------|-------|-----|--|----|
|                                     |                                  | <41 times;<br>n=14 used<br>>=41 times                                                 |         |                  |    |        |        |        |   |   |   |         |       |     |  |    |
| 7. DPP<br><i>Observational</i>      | complete 24 lessons              | n = 8 completed 21-24 lessons                                                         | modules | biweekly         | 52 | less   | less   | 1/week | - | - | + | a,b,c,e | j,k   | r   |  | 16 |
| 8. NetPLAY<br><i>RCT</i>            | once a week for at least 8 weeks | n = 15 used at least once per week for a minimum of 8 weeks                           | modules | weekly           | 12 | FNS    | 1/week | FNS    | - | - | - | a,b,c,e | j,k   | r   |  | 60 |
| 9. My Path1<br><i>RCT</i>           | login weekly                     | 66% logged in weekly from 0 to 6 weeks; 44% logged in weekly from 6 weeks to 4 months | free    | once in 4 months | 16 | more   | FNS    | FNS    | - | - | + | a,b,c,e | j,k   | r   |  | 44 |
| 10. My Path2<br><i>RCT</i>          | login weekly                     | 74% logged in weekly from 0 to 6 weeks; 41% logged in weekly from 6 weeks to 4 months | free    | once in 4 months | 16 | more   | less   | less   | + | - | + | a,b,c,e | j,k   | o,r |  | 51 |
| 11. YourWay<br><i>RCT</i>           | view 6 stories in 11 weeks       | 63% viewed all 6 stories                                                              | modules | biweekly         | 11 | 1/week | FNS    | FNS    | - | - | - | b,c,d,f | j,k,l | p,r |  | 63 |
| 12. Diabetergestemd<br><i>RCT</i>   | complete 8 lessons               | n = 53 completed all 8 lessons                                                        | modules | weekly           | 8  | 1/week | 1/week | FNS    | - | - | - | a,b,c,e | j,l   | o,r |  | 42 |
| 13. WebEase<br><i>Observational</i> | complete 3 biweekly modules      | n = 15 completed all 3 modules                                                        | modules | daily            | 6  | FNS    | none   | FNS    | - | - | - | a,b,c,e | -     | r   |  | 43 |
| 14. Rekindle<br><i>RCT</i>          | complete 5 modules in 10 weeks   | n = 12 completed all 5 modules                                                        | modules | biweekly         | 10 | none   | less   | none   | - | - | - | b,e     | j     | -   |  | 30 |
| 15. Heartnet                        | at least weekly                  | n = 10 used                                                                           | free    | none             | 17 | none   | FNS    | FNS    | - | - | + | a,b     | k     | r   |  | 42 |

|                                            |                                             |                                                                                                                  |         |                          |    |        |        |      |   |   |   |         |         |       |  |    |
|--------------------------------------------|---------------------------------------------|------------------------------------------------------------------------------------------------------------------|---------|--------------------------|----|--------|--------|------|---|---|---|---------|---------|-------|--|----|
| <i>Observational</i>                       |                                             | weekly or more often                                                                                             |         |                          |    |        |        |      |   |   |   |         |         |       |  |    |
| 16. Ljottson <i>RCT</i>                    | complete 5 steps in 10 weeks                | n = 29 reached fifth step and engaged in exposure exercises                                                      | modules | weekly for first 5 weeks | 10 | none   | weekly | FNS  | - | - | + | b,c     | j       | r     |  | 74 |
| 17. MyMigraine <i>Observational</i>        | complete 8 lessons in 10 weeks              | n = 6 completed 8 lessons                                                                                        | modules | weekly                   | 10 | FNS    | none   | none | - | - | - | b,e     | k,l     | o     |  | 60 |
| 18. EPP online <i>Observational</i>        | login several times a week                  | 79% reached last session                                                                                         | modules | weekly                   | 6  | FNS    | more   | more | - | - | - | a,b,c,e | j,k     | o,r,s |  | 79 |
| 19. Andersson-T <i>RCT</i>                 | complete 6 modules                          | n = 26 finished treatment                                                                                        | modules | weekly                   | 6  | none   | 1/week | none | - | - | - | b,c,e   | k       | -     |  | 49 |
| <i>Lifestyle</i>                           |                                             |                                                                                                                  |         |                          |    |        |        |      |   |   |   |         |         |       |  |    |
| 20. 5 a Day, the Rio Grande Way <i>RCT</i> | Login once a month                          | 192 used at least once; of these mean login = 3.3; 75 <sup>th</sup> percentile = 4; n = 48 used at least 4 times | free    | monthly                  | 17 | less   | none   | none | - | - | - | a       | k       | -     |  | 13 |
| 21. Active U <i>Observational</i>          | Login and enter monitoring data once a week | n = 2304 entered data for all 8 weeks of the program                                                             | free    | weekly                   | 8  | 1/week | none   | FNS  | - | - | - | c,e     | j,k     | s,t   |  | 31 |
| 22. Fun, Food and Fitness Club <i>RCT</i>  | Login once a week and complete activities   | Study 1 (I = 19): lowest logon % per week = 37%; Study 2 (I = 78) lowest logon % per week = 68%                  | modules | weekly                   | 8  | 1/week | weekly | none | - | - | + | b,c,e,f | i,j,l,m | o,s   |  | 63 |
| 23. Healthy Life Check                     | login multiple times                        | n = 4857 visited more                                                                                            | free    | none                     | NS | FNS    | none   | none | - | - | - | b,c,e   | -       | -     |  | 6  |

|                                 |                                  |                                                                                                   |         |          |     |        |        |        |   |   |   |               |         |     |  |    |
|---------------------------------|----------------------------------|---------------------------------------------------------------------------------------------------|---------|----------|-----|--------|--------|--------|---|---|---|---------------|---------|-----|--|----|
| <i>Observational</i>            |                                  | than once                                                                                         |         |          |     |        |        |        |   |   |   |               |         |     |  |    |
| 24. Happy Ending RCT            | 400 contact moments              | Study 1: n = 45 quit the intervention;<br>Study 2: n = 57 quit the intervention                   | modules | daily    | 54  | more   | none   | none   | - | + | + | a,b,c,e       | j,k     | -   |  | 70 |
| 25. Lenert Observational        | complete 8 modules               | n = 10 completed all modules                                                                      | modules | weekly   | 8   | 1/week | none   | none   | - | - | - | a,b,c,e       | j       | -   |  | 20 |
| 26. QuitCoach Observational     | Login at least 5 times           | 3% used at least 5 times                                                                          | free    | none     | NS  | less   | none   | none   | - | - | - | a,b,c,e       | j       | -   |  | 3  |
| 27. QuitNet Observational       | Login at least 4 times           | Study 1: n = 425 used at least 4 times;<br>Study 2: n = 115 used at least 4 times                 | free    | none     | NS  | less   | FNS    | FNS    | - | - | - | a,c,e,f       | j       | r   |  | 23 |
| 28. Real U RCT                  | 20 weekly visits                 | n = 172 visited weekly                                                                            | modules | weekly   | 30  | 1/week | none   | 1/week | - | - | - | b,c,e         | j       | o,u |  | 67 |
| 29. Health Partners RCT         | complete 10 biweekly modules     | 18% was counseled for 10 modules                                                                  | modules | biweekly | 20  | less   | less   | none   | - | + | - | a,b,c,e       | j       | -   |  | 18 |
| 30. Healthy Weight for Life RCT | Login and enter data once a week | 39% used diet log at least weekly                                                                 | free    | FNS      | 52  | none   | FNS    | 1/week | - | - | - | a,e           | -       | o,r |  | 39 |
| 31. LEARN RCT                   | 5 logins a week                  | Mean login 2 per week; 4 <sup>th</sup> quartile 133.6±83.7 logins; n = 57 used at least 120 times | modules | weekly   | 24  | 1/week | 1/week | none   | - | - | + | b,c,e         | -       | -   |  | 25 |
| 32. Weight Loss Management RCT  | login once a month               | n = 212 logging in and having at least one weight entry for 26/28                                 | free    | weekly   | 130 | 1/week | FNS    | FNS    | - | - | + | a,b,c,d,e,f,g | i,j,k,m | r   |  | 61 |

|                                             |                                                                                          |                                                                               |         |        |    |        |        |      |   |   |   |           |       |     |    |  |
|---------------------------------------------|------------------------------------------------------------------------------------------|-------------------------------------------------------------------------------|---------|--------|----|--------|--------|------|---|---|---|-----------|-------|-----|----|--|
|                                             |                                                                                          | months                                                                        |         |        |    |        |        |      |   |   |   |           |       |     |    |  |
| 33. Step up, Trim down<br><i>RCT</i>        | using the website at least 3 times weekly                                                | at least n = 22 met login goal each week                                      | free    | none   | 12 | more   | less   | none | + | - | + | a,c,e     | j,m   | p,r | 43 |  |
| 34. Healthy Weight Assistant<br><i>RCT</i>  | biweekly visits                                                                          | n = 4 logged in 6 times or more                                               | free    | FNS    | 12 | less   | none   | none | - | - | - | b,c,d,e   | j     | -   | 3  |  |
| 35. SHED-IT<br><i>RCT</i>                   | at least 7 weeks of submission of daily eating and exercise diaries and weekly check-ins | n = 14 complied                                                               | free    | none   | 12 | more   | less   | FNS  | - | - | - | a,c,e     | m     | r   | 41 |  |
| Mental Health                               |                                                                                          |                                                                               |         |        |    |        |        |      |   |   |   |           |       |     |    |  |
| 36. BRAVE1<br><i>RCT</i>                    | complete 10 weekly sessions                                                              | n = 13 completed all sessions                                                 | modules | weekly | 10 | more   | 1/week | none | - | - | + | b,c       | j,k,m | -   | 32 |  |
| 37. BRAVE2<br><i>RCT</i>                    | finish 10 sessions                                                                       | 39% finished 10 modules                                                       | modules | weekly | 12 | more   | 1/week | none | - | - | + | b,c,d,e,f | j,l,m | o   | 39 |  |
| 38. Worry Program<br><i>RCT</i>             | complete 6 lessons in 9 weeks                                                            | n = 18 finished all lessons                                                   | modules | weekly | 9  | more   | 1/week | FNS  | - | - | + | b,c       | j,n   | o,r | 72 |  |
| 39. Anxiety program<br><i>RCT</i>           | complete 6 lessons in 8 weeks                                                            | n = 30 completed all 6 lessons                                                | modules | weekly | 8  | 1/week | 1/week | FNS  | - | - | - | b,c       | j,l   | o,r | 75 |  |
| 40. Andersson-A<br><i>Observational</i>     | complete 10 self-chosen modules                                                          | n = 9 completed 10 modules                                                    | modules | weekly | 10 | none   | 1/week | none | - | - | - | b,c,d     | j     | -   | 33 |  |
| 41. Hedman<br><i>RCT</i>                    | complete all 12 modules                                                                  | n = 14 completed 12 modules                                                   | modules | weekly | 12 | none   | 1/week | FNS  | - | - | - | b,c       | j     | r   | 35 |  |
| 42. Down Your Drink<br><i>Observational</i> | complete 6 lessons                                                                       | Study 1: n= 79 completed all lessons; Study 2: n = 1654 completed all lessons | modules | weekly | 6  | more   | none   | FNS  | - | + | - | a,b,c,e,f | j,k   | r   | 15 |  |

|                                              |                                                           |                                                                                  |         |                      |    |        |        |      |   |   |   |         |         |       |    |
|----------------------------------------------|-----------------------------------------------------------|----------------------------------------------------------------------------------|---------|----------------------|----|--------|--------|------|---|---|---|---------|---------|-------|----|
| 43. Alcohol de Baas1<br><i>Observational</i> | complete 12 week program                                  | n = 173 completed treatment                                                      | modules | weekly               | 12 | more   | more   | FNS  | - | - | - | a,b,c,e | j       | r     | 21 |
| 44. Alcohol de Baas2<br><i>RCT</i>           | complete 12 week program                                  | n= 36 completed treatment                                                        | modules | weekly               | 12 | more   | more   | FNS  | - | - | - | a,b,c,e | j       | r     | 46 |
| 45. M-PASS<br><i>RCT</i>                     | complete 4 online sessions                                | 80% completed all 4 sessions                                                     | modules | weekly for 4 weeks   | 9  | more   | none   | none | - | - | - | a,b,c,e | j,l,m,n | q     | 80 |
| 46. MORE<br><i>Observational</i>             | finish 7 modules in 18 months                             | n = 58 accessed all 7 modules                                                    | modules | 7 times in 18 months | 78 | less   | less   | FNS  | - | - | + | a,b,c,e | j,k,m   | r,u   | 5  |
| 47. RealTeen<br><i>RCT</i>                   | finish 12 modules in 6 weeks                              | n = 108 completed all 12 sessions                                                | modules | twice weekly         | 6  | more   | none   | FNS  | - | - | - | a,b,c,d | i,l,m,n | o,p,r | 92 |
| 48. BEP1<br><i>RCT</i>                       | complete 8 modules                                        | n = 80 completed 8 modules                                                       | modules | weekly               | 8  | 1/week | none   | none | - | - | - | b       | j,m     | -     | 67 |
| 49. BEP2<br><i>RCT</i>                       | complete 8 modules                                        | n = 80 completed 8 modules                                                       | modules | weekly               | 8  | 1/week | FNS    | none | - | - | - | b,c     | j,m     | o     | 81 |
| 50. All under Control<br><i>RCT</i>          | complete 4 lessons                                        | Study 1: n= 59 completed whole course;<br>Study 2: n = 33 completed whole course | modules | weekly               | 5  | 1/week | 1/week | none | - | - | - | a,b,c   | j       | o     | 47 |
| 51. Colour your Life1<br><i>RCT</i>          | complete 8 sessions and a booster sessions 12 weeks later | n = 14 completed 8 sessions                                                      | modules | weekly               | 9  | 1/week | none   | none | - | - | - | b,e     | -       | -     | 14 |
| 52. Colour your Life2<br><i>RCT</i>          | complete 8 sessions and a booster sessions 12 weeks later | n = 34 completed whole course                                                    | modules | weekly               | 9  | 1/week | 1/week | none | - | - | - | a,b,c   | j       | -     | 39 |
| 53. Deprexis                                 | complete 9/12                                             | n = 46                                                                           | free    | none                 | 9  | FNS    | none   | none | - | - | - | b,c     | k,n     | -     | 14 |

|                                              |                                                                      |                                               |         |          |    |        |        |        |   |   |   |         |       |         |    |  |
|----------------------------------------------|----------------------------------------------------------------------|-----------------------------------------------|---------|----------|----|--------|--------|--------|---|---|---|---------|-------|---------|----|--|
| <i>RCT</i>                                   | modules                                                              | completed 9 modules                           |         |          |    |        |        |        |   |   |   |         |       |         |    |  |
| 54. Master your Mood<br><i>Observational</i> | complete 8 lessons                                                   | n = 50 completed all sessions                 | modules | weekly   | 8  | none   | more   | 1/week | - | + | - | b,c     | j     | p,r     | 26 |  |
| 55. MoodGym<br><i>RCT</i>                    | complete 5 modules                                                   | n = 9 completed 5 modules                     | modules | weekly   | 6  | none   | none   | none   | - | - | - | b       | l     | -       | 2  |  |
| 56. Sadness<br><i>RCT</i>                    | complete 6 lessons in 8 weeks                                        | n = 20 completed all lessons                  | modules | weekly   | 8  | none   | 1/week | 1/week | - | - | + | b,c     | j,l   | o,p,r   | 74 |  |
| 57. MoodManager<br><i>Observational</i>      | complete 6 learning modules and fill out self-management tools daily | n = 19 completed 6 modules                    | modules | weekly   | 6  | more   | more   | none   | - | - | + | a,b,c,e | j,k,m | -       | 91 |  |
| 58. Vernmark<br><i>RCT</i>                   | finish all 7 modules in time                                         | n = 17 finished in time                       | modules | weekly   | 8  | 1/week | 1/week | none   | - | - | - | b,c     | j     | -       | 59 |  |
| 59. Wellbeing program<br><i>RCT</i>          | complete 8 lessons in 10 weeks                                       | n = 30 completed all 8 lessons                | modules | weekly   | 10 | more   | 1/week | 1/week | - | - | + | b,c     | j,k,l | o,p,r,u | 81 |  |
| 60. Carrard1<br><i>Observational</i>         | complete 7 modules                                                   | n = 40 completed all 7 modules                | modules | biweekly | 16 | FNS    | 1/week | none   | - | - | - | a,b,c,e | l     | o       | 31 |  |
| 61. Carrard2<br><i>RCT</i>                   | complete 11 modules in 6 months                                      | n = 25/74 completed 11 modules                | modules | biweekly | 26 | FNS    | 1/week | none   | - | - | + | a,b,c,e | j     | -       | 34 |  |
| 62. Carlbring1<br><i>RCT</i>                 | complete 10 lessons and post in the bulletin board                   | 28% finished all modules within the timeframe | modules | weekly   | 10 | 1/week | 1/week | 1/week | - | - | - | b,c     | -     | o,r     | 28 |  |
| 63. Carlbring2<br><i>RCT</i>                 | complete 10 lessons and post in the bulletin board                   | 80% finished all modules within the timeframe | modules | weekly   | 10 | 1/week | more   | 1/week | - | - | + | b,c     | j     | o,r     | 80 |  |
| 64. Panic Center<br><i>Observational</i>     | complete 12 lessons                                                  | n = 12 completed the                          | modules | weekly   | 12 | 1/week | FNS    | FNS    | - | - | - | b,e     | -     | r       | 1  |  |

|                                         |                                   |                                                                                                                          |         |                   |    |      |        |      |   |   |   |       |     |       |  |    |
|-----------------------------------------|-----------------------------------|--------------------------------------------------------------------------------------------------------------------------|---------|-------------------|----|------|--------|------|---|---|---|-------|-----|-------|--|----|
|                                         |                                   | 12 week program                                                                                                          |         |                   |    |      |        |      |   |   |   |       |     |       |  |    |
| 65. Panic Online1<br><i>RCT</i>         | complete 6 modules                | Study 1: n= 18 completed all modules;<br>Study 2: n = 10 completed all modules                                           | modules | weekly            | 8  | none | more   | none | - | - | - | a,b,c | -   | -     |  | 90 |
| 66. Panic Online2<br><i>RCT</i>         | complete 8 modules                | Study 1: n= 10 completed all modules;<br>Study 2: n = 41 completed all modules;<br>Study 3: n = 22 completed all modules | modules | weekly            | 12 | none | more   | none | - | - | - | a,b,c | j   | -     |  | 86 |
| 67. Panic Online3<br><i>RCT</i>         | complete 8 modules                | n= 21 completed all modules                                                                                              | modules | weekly            | 12 | none | 1/week | none | - | - | - | a,b,c | j   | -     |  | 72 |
| 68. Interapy<br><i>RCT</i>              | complete 7 modules in 11 weeks    | n = 47/58 completed treatment<br>Note: waiting list had access to intervention after intervention period                 | modules | at least biweekly | 11 | none | more   | none | - | - | - | b,c,e | k   | -     |  | 81 |
| 69. Panic program<br><i>RCT</i>         | complete all 6 lessons            | n = 23 completed all 6 lessons                                                                                           | modules | biweekly          | 8  | none | less   | less | - | - | + | b,c   | j,l | o,p,r |  | 79 |
| 70. PTSD program<br><i>RCT</i>          | complete all 7 lessons in 8 weeks | n = 18 completed all 7 lessons                                                                                           | modules | weekly            | 8  | more | 1/week | FNS  | - | - | + | b,c   | j,k | o,r   |  | 78 |
| 71. PTSD online<br><i>Observational</i> | complete 10 modules in 10 weeks   | n = 16 completed the program                                                                                             | modules | weekly            | 10 | none | 1/week | none | - | - | - | b,c   | k   | -     |  | 73 |



|                                      |                                                         |                                                                                                                       |         |        |    |        |        |        |   |   |   |     |     |       |    |
|--------------------------------------|---------------------------------------------------------|-----------------------------------------------------------------------------------------------------------------------|---------|--------|----|--------|--------|--------|---|---|---|-----|-----|-------|----|
| 72. Andersson-S1<br><i>RCT</i>       | complete 9 modules + post on bulletin board once a week | Study 1: n= 8 completed all modules;<br>Study 2: n = 18 completed all modules                                         | modules | weekly | 9  | 1/week | 1/week | 1/week | + | - | + | b,c | j   | o,r   | 51 |
| 73. Andersson-S2<br><i>RCT</i>       | complete 9 modules + post on bulletin board once a week | Study 1: n= 10 completed all modules;<br>Study 2: n= 37 completed all modules;<br>Study 3: n= 0 completed all modules | modules | weekly | 9  | 1/week | 1/week | 1/week | - | - | + | b,c | j   | o,r   | 48 |
| 74. Andersson-S3<br><i>RCT</i>       | complete 9 modules + post on bulletin board once a week | n= 27 completed all modules                                                                                           | modules | weekly | 9  | 1/week | more   | 1/week | - | - | + | b,c | j   | o,r   | 93 |
| 75. Andersson-S4<br><i>RCT</i>       | complete 15 modules                                     | n = 19 completed all modules                                                                                          | modules | weekly | 15 | 1/week | 1/week | none   | - | - | - | b,c | j   | -     | 30 |
| 76. IAR<br><i>RCT</i>                | complete 9 modules + post on bulletin board once a week | n = 10 completed all modules                                                                                          | modules | weekly | 9  | 1/week | 1/week | 1/week | - | - | - | b,c | j   | o,r   | 34 |
| 77. Shyness1<br><i>RCT</i>           | complete 6 lessons and post on bulletin board           | Study 1: n= 39 completed all lessons; Study 2: n = 33 completed all lessons; Study 3: n = 24 completed all lessons    | modules | weekly | 10 | none   | more   | 1/week | - | - | + | b,c | j,l | o,p,r | 79 |
| 78. Shyness2<br><i>Observational</i> | complete 6 lessons and post on bulletin board           | n = 14 completed all lessons                                                                                          | modules | weekly | 8  | none   | more   | 1/week | - | - | + | b,c | j,l | o,p,r | 74 |

|                             |                                               |                                                                                |         |        |    |      |        |        |   |   |   |     |     |       |    |
|-----------------------------|-----------------------------------------------|--------------------------------------------------------------------------------|---------|--------|----|------|--------|--------|---|---|---|-----|-----|-------|----|
| 79. Shyness3<br><i>RCT</i>  | complete 6 lessons and post on bulletin board | n= 10 completed all lessons                                                    | modules | weekly | 10 | none | none   | 1/week | - | - | - | b   | l   | o,p,r | 33 |
| 80. Shyness4<br><i>RCT</i>  | complete 6 lessons                            | n= 56 completed all lessons                                                    | modules | weekly | 8  | more | none   | none   | - | + | - | b,c | j,l | o,p   | 67 |
| 81. Shyness5<br><i>RCT</i>  | complete 6 lessons                            | Study 1: n= 66 completed all modules;<br>Study 2: n = 34 completed all modules | modules | weekly | 8  | more | 1/week | none   | - | + | + | b,c | j,l | o,p   | 78 |
| 82. Shyness6<br><i>RCT</i>  | complete 6 lessons and post on bulletin board | n= 31 completed all lessons                                                    | modules | weekly | 8  | more | 1/week | 1/week | - | + | - | b,c | j,l | o,p,r | 76 |
| 83. Shyness 7<br><i>RCT</i> | complete all 8 lessons in 11 weeks            | n = 71 completed all 8 lessons                                                 | modules | weekly | 11 | more | none   | none   | - | - | - | b,c | j,l | o,p   | 64 |

<sup>a</sup>FNS = Frequency Not Specified; less = less than once a week; more = more than once a week; <sup>b</sup>1 = face to face; 2 = SMS; 3 = phone; <sup>c</sup>PTS = Primary Task Support; DS = Dialogue Support; SS = Social Support; a = Reduction; b = Tunneling ; c = Tailoring; d = Personalization; e = Self-monitoring; f = Simulation; g = Rehearsal; h = Praise; i = Rewards; j = Reminders; k = Suggestion; l = Similarity; m = Liking; n = Social role; o = Social learning; p = Social comparison; q = Normative influence; r = Social facilitation; s = Cooperation; t = Competition; u = Recognition
